# Supplementary material
Source: PubMed Central journal article supplement (PMC2664144)
Supplement: ddp043_1.pdf [file ddp043_1.pdf]

## Members of Wellcome Trust Case Control Consortium

**Management Committee:** Paul R Burton<sup>1</sup>, David G Clayton<sup>2</sup>, Lon R Cardon<sup>3</sup>, Nick Craddock<sup>4</sup>, Panos Deloukas<sup>5</sup>, Audrey Duncanson<sup>6</sup>, Dominic P Kwiatkowski<sup>3,5</sup>, Mark I McCarthy<sup>3,7</sup>, Willem H Ouwehand<sup>8,9</sup>, Nilesh J Samani<sup>10</sup>, John A Todd<sup>2</sup>, Peter Donnelly (Chair)<sup>11</sup>

**Data and Analysis Committee:** Jeffrey C Barrett<sup>3</sup>, Paul R Burton<sup>1</sup>, Dan Davison<sup>11</sup>, Peter Donnelly<sup>11</sup>, Doug Easton<sup>12</sup>, David M. Evans<sup>3</sup>, Hin-Tak Leung<sup>2</sup>, Jonathan L Marchini<sup>11</sup>, Andrew P Morris<sup>3</sup>, Chris CA Spencer<sup>11</sup>, Martin D Tobin<sup>1</sup>, Lon R Cardon (Co-chair)<sup>3</sup>, David G Clayton (Co-chair)<sup>2</sup>

**UK Blood Services & University of Cambridge Controls:** Antony P Attwood<sup>5,8</sup>, James P Boorman<sup>8,9</sup>, Barbara Cant<sup>8</sup>, Ursula Everson<sup>13</sup>, Judith M Hussey<sup>14</sup>, Jennifer D Jolley<sup>8</sup>, Alexandra S Knight<sup>8</sup>, Kerstin Koch<sup>8</sup>, Elizabeth Meech<sup>15</sup>, Sarah Nutland<sup>2</sup>, Christopher V Prowse<sup>16</sup>, Helen E Stevens<sup>2</sup>, Niall C Taylor<sup>8</sup>, Graham R Walters<sup>17</sup>, Neil M Walker<sup>2</sup>, Nicholas A Watkins<sup>8,9</sup>, Thilo Winzer<sup>8</sup>, John A Todd<sup>2</sup>, Willem H Ouwehand<sup>8,9</sup>

**1958 Birth Cohort Controls:** Richard W Jones<sup>18</sup>, Wendy L McArdle<sup>18</sup>, Susan M Ring<sup>18</sup>, David P Strachan<sup>19</sup>, Marcus Pembrey<sup>18,20</sup>

**Bipolar Disorder (Aberdeen):** Gerome Breen<sup>21</sup>, David St Clair<sup>21</sup>; **(Birmingham):** Sian Caesar<sup>22</sup>, Katherine Gordon-Smith<sup>22,23</sup>, Lisa Jones<sup>22</sup>; **(Cardiff):** Christine Fraser<sup>23</sup>, Elaine K Green<sup>23</sup>, Detelina Grozeva<sup>23</sup>, Marian L Hamshere<sup>23</sup>, Peter A Holmans<sup>23</sup>, Ian R Jones<sup>23</sup>, George Kirov<sup>23</sup>, Valentina Moskvina<sup>23</sup>, Ivan Nikolov<sup>23</sup>, Michael C O'Donovan<sup>23</sup>, Michael J Owen<sup>23</sup>, Nick Craddock<sup>23</sup>; **(London):** David A Collier<sup>24</sup>, Amanda Elkin<sup>24</sup>, Anne Farmer<sup>24</sup>, Richard Williamson<sup>24</sup>, Peter McGuffin<sup>24</sup>; **(Newcastle):** Allan H Young<sup>25</sup>, I Nicol Ferrier<sup>25</sup>

**Coronary Artery Disease (Leeds):** Stephen G Ball<sup>26</sup>, Anthony J Balmforth<sup>26</sup>, Jennifer H Barrett<sup>26</sup>, D Timothy Bishop<sup>26</sup>, Mark M Iles<sup>26</sup>, Azhar Maqbool<sup>26</sup>, Nadira Yuldasheva<sup>26</sup>, Alistair S Hall<sup>26</sup>; **(Leicester):** Peter S Braund<sup>10</sup>, Paul R Burton<sup>1</sup>, Richard J Dixon<sup>10</sup>, Massimo Mangino<sup>10</sup>, Suzanne Stevens<sup>10</sup>, Martin D Tobin<sup>1</sup>, John R Thompson<sup>1</sup>, Nilesh J Samani<sup>10</sup>

**Crohn's Disease (Cambridge):** Francesca Bredin<sup>27</sup>, Mark Tremelling<sup>27</sup>, Miles Parkes<sup>27</sup>; **(Edinburgh):** Hazel Drummond<sup>28</sup>, Charles W Lees<sup>28</sup>, Elaine R Nimmo<sup>28</sup>, Jack Satsangi<sup>28</sup>; **(London):** Sheila A Fisher<sup>29</sup>, Alastair Forbes<sup>30</sup>, Cathryn M Lewis<sup>29</sup>, Clive M Onnie<sup>29</sup>, Natalie J Prescott<sup>29</sup>, Jeremy Sanderson<sup>31</sup>, Christopher G Mathew<sup>29</sup>; **(Newcastle):** Jamie Barbour<sup>32</sup>, M Khalid Mohiuddin<sup>32</sup>, Catherine E Todhunter<sup>32</sup>, John C Mansfield<sup>32</sup>; **(Oxford):** Tariq Ahmad<sup>33</sup>, Fraser R Cummings<sup>33</sup>, Derek P Jewell<sup>33</sup>

**Hypertension (Aberdeen):** John Webster<sup>34</sup>; **(Cambridge):** Morris J Brown<sup>35</sup>, David G Clayton<sup>2</sup>; **(Evry, France):** G Mark Lathrop<sup>36</sup>; **(Glasgow):** John Connell<sup>37</sup>, Anna Dominiczak<sup>37</sup>; **(Leicester):** Nilesh J Samani<sup>10</sup>; **(London):** Carolina A Braga Marcano<sup>38</sup>, Beverley Burke<sup>38</sup>, Richard Dobson<sup>38</sup>, Johannie Gungadoo<sup>38</sup>, Kate L Lee<sup>38</sup>, Patricia B Munroe<sup>38</sup>, Stephen J Newhouse<sup>38</sup>, Abiodun Onipinla<sup>38</sup>, Chris Wallace<sup>38</sup>, Mingzhan Xue<sup>38</sup>, Mark Caulfield<sup>38</sup>; **(Oxford):** Martin Farrall<sup>39</sup>

**Rheumatoid Arthritis:** Anne Barton<sup>40</sup>, Ian N Bruce<sup>40</sup>, Hannah Donovan<sup>40</sup>, Steve Eyre<sup>40</sup>, Paul D Gilbert<sup>40</sup>, Samantha L Hider<sup>40</sup>, Anne M Hinks<sup>40</sup>, Sally L John<sup>40</sup>, Catherine Potter<sup>40</sup>, Alan J Silman<sup>40</sup>, Deborah PM Symmons<sup>40</sup>, Wendy Thomson<sup>40</sup>, Jane Worthington<sup>40</sup>

**Type 1 Diabetes:** David G Clayton<sup>2</sup>, David B Dunger<sup>2,41</sup>, Sarah Nutland<sup>2</sup>, Helen E Stevens<sup>2</sup>, Neil M Walker<sup>2</sup>, Barry Widmer<sup>2,41</sup>, John A Todd<sup>2</sup>

**Type 2 Diabetes (Exeter):** Timothy M Frayling<sup>42,43</sup>, Rachel M Freathy<sup>42,43</sup>, Hana Lango<sup>42,43</sup>, John R B Perry<sup>42,43</sup>, Beverley M Shields<sup>43</sup>, Michael N Weedon<sup>42,43</sup>, Andrew T Hattersley<sup>42,43</sup>; **(London):** Graham A Hitman<sup>44</sup>; **(Newcastle):** Mark Walker<sup>45</sup>; **(Oxford):** Kate S Elliott<sup>3,7</sup>, Christopher J Groves<sup>7</sup>, Cecilia M Lindgren<sup>3,7</sup>, Nigel W Rayner<sup>3,7</sup>, Nicholas J Timpson<sup>3,46</sup>, Eleftheria Zeggini<sup>3,7</sup>, Mark I McCarthy<sup>3,7</sup>

**Tuberculosis (Gambia):** Melanie Newport<sup>47</sup>, Giorgio Sirugo<sup>47</sup>; **(Oxford):** Emily Lyons<sup>3</sup>, Fredrik Vannberg<sup>3</sup>, Adrian VS Hill<sup>3</sup>

**Ankylosing Spondylitis:** Linda A Bradbury<sup>48</sup>, Claire Farrar<sup>49</sup>, Jennifer J Pointon<sup>48</sup>, Paul Wordsworth<sup>49</sup>, Matthew A Brown<sup>48,49</sup>

**AutoImmune Thyroid Disease:** Jayne A Franklyn<sup>50</sup>, Joanne M Heward<sup>50</sup>, Matthew J Simmonds<sup>50</sup>, Stephen CL Gough<sup>50</sup>

**Breast Cancer:** Sheila Seal<sup>51</sup>, Michael R Stratton<sup>51,52</sup>, Nazneen Rahman<sup>51</sup>

**Multiple Sclerosis:** Maria Ban<sup>53</sup>, An Goris<sup>53</sup>, Stephen J Sawcer<sup>53</sup>, Alastair Compston<sup>53</sup>

**Gambian Controls (Gambia):** David Conway<sup>47</sup>, Muminatou Jallow<sup>47</sup>, Melanie Newport<sup>47</sup>, Giorgio Sirugo<sup>47</sup>; **(Oxford):** Kirk A Rockett<sup>3</sup>, Dominic P Kwiatkowski<sup>3,5</sup>

**DNA, Genotyping, Data QC and Informatics (Wellcome Trust Sanger Institute, Hinxton):** Suzannah J Bumpstead<sup>5</sup>, Amy Chaney<sup>5</sup>, Kate Downes<sup>2,5</sup>, Mohammed JR Ghor<sup>5</sup>, Rhian Gwilliam<sup>5</sup>, Sarah E Hunt<sup>5</sup>, Michael Inouye<sup>5</sup>, Andrew Keniry<sup>5</sup>, Emma King<sup>5</sup>, Ralph McGinnis<sup>5</sup>, Simon Potter<sup>5</sup>, Rathi Ravindrarajah<sup>5</sup>, Pamela Whittaker<sup>5</sup>, Claire Widden<sup>5</sup>, David Withers<sup>5</sup>, Panos Deloukas<sup>5</sup>; **(Cambridge):** Hin-Tak Leung<sup>2</sup>, Sarah Nutland<sup>2</sup>, Helen E Stevens<sup>2</sup>, Neil M Walker<sup>2</sup>, John A Todd<sup>2</sup>

**Statistics (Cambridge):** Doug Easton<sup>12</sup>, David G Clayton<sup>2</sup>; **(Leicester):** Paul R Burton<sup>1</sup>, Martin D Tobin<sup>1</sup>; **(Oxford):** Jeffrey C Barrett<sup>3</sup>, David M Evans<sup>3</sup>, Andrew P Morris<sup>3</sup>, Lon R Cardon<sup>3</sup>; **(Oxford):** Niall J Cardin<sup>11</sup>, Dan Davison<sup>11</sup>, Teresa Ferreira<sup>11</sup>, Joanne Pereira-Gale<sup>11</sup>, Ingeleif B Hallgrimsdóttir<sup>11</sup>, Bryan N Howie<sup>11</sup>, Jonathan L Marchini<sup>11</sup>, Chris CA Spencer<sup>11</sup>, Zhan Su<sup>11</sup>, Yik Ying Teo<sup>3,11</sup>, Damjan Vukcevic<sup>11</sup>, Peter Donnelly<sup>11</sup>

**PIs:** David Bentley<sup>5,54</sup>, Matthew A Brown<sup>48,49</sup>, Lon R Cardon<sup>3</sup>, Mark Caulfield<sup>38</sup>, David G Clayton<sup>2</sup>, Alistair Compston<sup>53</sup>, Nick Craddock<sup>23</sup>, Panos Deloukas<sup>5</sup>, Peter Donnelly<sup>11</sup>, Martin Farrall<sup>39</sup>, Stephen CL Gough<sup>50</sup>, Alistair S Hall<sup>26</sup>, Andrew T Hattersley<sup>42,43</sup>, Adrian VS Hill<sup>3</sup>, Dominic P Kwiatkowski<sup>3,5</sup>, Christopher G Mathew<sup>29</sup>, Mark I McCarthy<sup>3,7</sup>, Willem H

Ouwehand<sup>8,9</sup>, Miles Parkes<sup>27</sup>, Marcus Pembrey<sup>18,20</sup>, Nazneen Rahman<sup>51</sup>, Nilesh J Samani<sup>10</sup>, Michael R Stratton<sup>51,52</sup>, John A Todd<sup>2</sup>, Jane Worthington<sup>40</sup>

<sup>1</sup> Genetic Epidemiology Group, Department of Health Sciences, University of Leicester, Adrian Building, University Road, Leicester, LE1 7RH, UK;

<sup>2</sup> Juvenile Diabetes Research Foundation/Wellcome Trust Diabetes and Inflammation Laboratory, Department of Medical Genetics, Cambridge Institute for Medical Research, University of Cambridge, Wellcome Trust/MRC Building, Cambridge, CB2 0XY, UK;

<sup>3</sup> Wellcome Trust Centre for Human Genetics, University of Oxford, Roosevelt Drive, Oxford OX3 7BN, UK;

<sup>4</sup> Department of Psychological Medicine, Henry Wellcome Building, School of Medicine, Cardiff University, Heath Park, Cardiff CF14 4XN, UK;

<sup>5</sup> The Wellcome Trust Sanger Institute, Wellcome Trust Genome Campus, Hinxton, Cambridge CB10 1SA, UK;

<sup>6</sup> The Wellcome Trust, Gibbs Building, 215 Euston Road, London NW1 2BE, UK;

<sup>7</sup> Oxford Centre for Diabetes, Endocrinology and Medicine, University of Oxford, Churchill Hospital, Oxford, OX3 7LJ, UK;

<sup>8</sup> Department of Haematology, University of Cambridge, Long Road, Cambridge, CB2 2PT, UK;

<sup>9</sup> National Health Service Blood and Transplant, Cambridge Centre, Long Road, Cambridge, CB2 2PT, UK;

<sup>10</sup> Department of Cardiovascular Sciences, University of Leicester, Glenfield Hospital, Groby Road, Leicester, LE3 9QP, UK;

<sup>11</sup> Department of Statistics, University of Oxford, 1 South Parks Road, Oxford OX1 3TG, UK;

<sup>12</sup> Cancer Research UK Genetic Epidemiology Unit, Strangeways Research Laboratory, Worts Causeway, Cambridge CB1 8RN, UK;

<sup>13</sup> National Health Service Blood and Transplant, Sheffield Centre, Longley Lane, Sheffield S5 7JN, UK;

<sup>14</sup> National Health Service Blood and Transplant, Brentwood Centre, Crescent Drive, Brentwood, CM15 8DP, UK;

<sup>15</sup> The Welsh Blood Service, Ely Valley Road, Talbot Green, Pontyclun, CF72 9WB, UK;

<sup>16</sup> The Scottish National Blood Transfusion Service, Ellen's Glen Road, Edinburgh, EH17 7QT, UK;

<sup>17</sup> National Health Service Blood and Transplant, Southampton Centre, Cxford Road, Southampton, SO16 5AF, UK;

<sup>18</sup> Avon Longitudinal Study of Parents and Children, University of Bristol, 24 Tyndall Avenue, Bristol, BS8 1TQ, UK;

<sup>19</sup> Division of Community Health Services, St George's University of London, Cranmer Terrace, London SW17 0RE, UK;

<sup>20</sup> Institute of Child Health, University College London, 30 Guilford St, London WC1N 1EH, UK;

<sup>21</sup> University of Aberdeen, Institute of Medical Sciences, Foresterhill, Aberdeen, AB25 2ZD, UK;

<sup>22</sup> Department of Psychiatry, Division of Neuroscience, Birmingham University, Birmingham, B15 2QZ, UK;

<sup>23</sup> Department of Psychological Medicine, Henry Wellcome Building, School of Medicine, Cardiff University, Heath Park, Cardiff CF14 4XN, UK;

- <sup>24</sup> SGDP, The Institute of Psychiatry, King's College London, De Crespigny Park Denmark Hill London SE5 8AF, UK;
- <sup>25</sup> School of Neurology, Neurobiology and Psychiatry, Royal Victoria Infirmary, Queen Victoria Road, Newcastle upon Tyne, NE1 4LP, UK;
- <sup>26</sup> LIGHT and LImm Research Institutes, Faculty of Medicine and Health, University of Leeds, Leeds, LS1 3EX, UK;
- <sup>27</sup> IBD Research Group, Addenbrooke's Hospital, University of Cambridge, Cambridge, CB2 2QQ, UK;
- <sup>28</sup> Gastrointestinal Unit, School of Molecular and Clinical Medicine, University of Edinburgh, Western General Hospital, Edinburgh EH4 2XU UK;
- <sup>29</sup> Department of Medical & Molecular Genetics, King's College London School of Medicine, 8th Floor Guy's Tower, Guy's Hospital, London, SE1 9RT, UK;
- <sup>30</sup> Institute for Digestive Diseases, University College London Hospitals Trust, London, NW1 2BU, UK;
- <sup>31</sup> Department of Gastroenterology, Guy's and St Thomas' NHS Foundation Trust, London, SE1 7EH, UK;
- <sup>32</sup> Department of Gastroenterology & Hepatology, University of Newcastle upon Tyne, Royal Victoria Infirmary, Newcastle upon Tyne, NE1 4LP, UK;
- <sup>33</sup> Gastroenterology Unit, Radcliffe Infirmary, University of Oxford, Oxford, OX2 6HE, UK;
- <sup>34</sup> Medicine and Therapeutics, Aberdeen Royal Infirmary, Foresterhill, Aberdeen, Grampian AB9 2ZB, UK;
- <sup>35</sup> Clinical Pharmacology Unit and the Diabetes and Inflammation Laboratory, University of Cambridge, Addenbrookes Hospital, Hills Road, Cambridge CB2 2QQ, UK;
- <sup>36</sup> Centre National de Genotypage, 2, Rue Gaston Cremieux, Evry, Paris 91057.;
- <sup>37</sup> BHF Glasgow Cardiovascular Research Centre, University of Glasgow, 126 University Place, Glasgow, G12 8TA, UK;
- <sup>38</sup> Clinical Pharmacology and Barts and The London Genome Centre, William Harvey Research Institute, Barts and The London, Queen Mary's School of Medicine, Charterhouse Square, London EC1M 6BQ, UK;
- <sup>39</sup> Cardiovascular Medicine, University of Oxford, Wellcome Trust Centre for Human Genetics, Roosevelt Drive, Oxford OX3 7BN, UK;
- <sup>40</sup> Epidemiology Research Unit, University of Manchester, Stopford Building, Oxford Rd, Manchester, M13 9PT, UK;
- <sup>41</sup> Department of Paediatrics, University of Cambridge, Addenbrooke's Hospital, Cambridge, CB2 2QQ, UK;
- <sup>42</sup> Genetics of Complex Traits, Institute of Biomedical and Clinical Science, Peninsula Medical School, Magdalen Road, Exeter EX1 2LU UK;
- <sup>43</sup> Diabetes Genetics, Institute of Biomedical and Clinical Science, Peninsula Medical School, Barrack Road, Exeter EX2 5DU UK;
- <sup>44</sup> Centre for Diabetes and Metabolic Medicine, Barts and The London, Royal London Hospital, Whitechapel, London, E1 1BB UK;
- <sup>45</sup> Diabetes Research Group, School of Clinical Medical Sciences, Newcastle University, Framlington Place, Newcastle upon Tyne NE2 4HH, UK;
- <sup>46</sup> The MRC Centre for Causal Analyses in Translational Epidemiology, Bristol University, Canynge Hall, Whiteladies Rd, Bristol BS2 8PR, UK;
- <sup>47</sup> MRC Laboratories, Fajara, The Gambia;

<sup>48</sup> Diamantina Institute for Cancer, Immunology and Metabolic Medicine, Princess Alexandra Hospital, University of Queensland, Woolloongabba, Qld 4102, Australia;

<sup>49</sup> Botnar Research Centre, University of Oxford, Headington, Oxford OX3 7BN, UK;

<sup>50</sup> Department of Medicine, Division of Medical Sciences, Institute of Biomedical Research, University of Birmingham, Edgbaston, Birmingham B15 2TT, UK;

<sup>51</sup> Section of Cancer Genetics, Institute of Cancer Research, 15 Cotswold Road, Sutton, SM2 5NG, UK;

<sup>52</sup> Cancer Genome Project, The Wellcome Trust Sanger Institute, Wellcome Trust Genome Campus, Hinxton, Cambridge CB10 1SA, UK;

<sup>53</sup> Department of Clinical Neurosciences, University of Cambridge, Addenbrooke's Hospital, Hills Road, Cambridge CB2 2QQ, UK;

<sup>54</sup> PRESENT ADDRESS: Illumina Cambridge, Chesterford Research Park, Little Chesterford, Nr Saffron Walden, Essex, CB10 1XL, UK.

## Members of the International Schizophrenia Consortium

**Manuscript preparation** Jennifer L. Stone<sup>1-4</sup>, Michael C. O'Donovan<sup>5</sup>, Hugh Gurling<sup>6</sup>, George K. Kirov<sup>5</sup>, Douglas H. R. Blackwood<sup>7</sup>, Aiden Corvin<sup>8</sup>, Nick J. Craddock<sup>5</sup>, Michael Gill<sup>8</sup>, Christina M. Hultman<sup>9,10</sup>, Paul Lichtenstein<sup>9</sup>, Andrew McQuillin<sup>6</sup>, Carlos N. Pato<sup>11</sup>, Douglas M. Ruderfer<sup>1-4</sup>, Michael J. Owen<sup>5</sup>, David St Clair<sup>12</sup>, Patrick F. Sullivan<sup>13</sup>, Pamela Sklar<sup>1-4</sup>, Shaun M. Purcell<sup>1-4</sup> (leader)

**Data analysis** Jennifer L. Stone<sup>1-4</sup>, Douglas M. Ruderfer<sup>1-4</sup>, Joshua Korn<sup>3,4</sup>, George Kirov<sup>5</sup>, Stuart Macgregor<sup>14</sup>, Andrew McQuillin<sup>6</sup>, Derek W. Morris<sup>8</sup>, Colm T. O'Dushlaine<sup>8</sup>, Mark J. Daly<sup>2-4</sup>, Peter M. Visscher<sup>14</sup>, Peter A. Holmans<sup>5</sup>, Michael C. O'Donovan<sup>5</sup>, Patrick F. Sullivan<sup>13</sup>, Pamela Sklar<sup>1-4</sup>, Shaun M. Purcell<sup>1-4</sup> (Leader)

**Management committee** Hugh Gurling<sup>6</sup>, Aiden Corvin<sup>8</sup>, Douglas H. R. Blackwood<sup>7</sup>, Nick J. Craddock<sup>5</sup>, Michael Gill<sup>8</sup>, Christina M. Hultman<sup>9,10</sup>, George K. Kirov<sup>5</sup>, Paul Lichtenstein<sup>9</sup>, Andrew McQuillin<sup>6</sup>, Michael C. O'Donovan<sup>5</sup>, Michael J. Owen<sup>5</sup>, Carlos N. Pato<sup>11</sup>, Shaun M. Purcell<sup>1-4</sup>, Edward M. Scolnick<sup>2,3</sup>, David St Clair<sup>12</sup>, Jennifer L. Stone<sup>1-4</sup>, Patrick F. Sullivan<sup>13</sup>, Pamela Sklar<sup>1-4</sup> (Leader)

**Cardiff University** Michael C. O'Donovan<sup>5</sup>, George K. Kirov<sup>5</sup>, Nick J. Craddock<sup>5</sup>, Peter A. Holmans<sup>5</sup>, Nigel M. Williams<sup>5</sup>, Lucy Georgieva<sup>5</sup>, Ivan Nikolov<sup>5</sup>, N. Norton<sup>5</sup>, H. Williams<sup>5</sup>, Draga Toncheva<sup>15</sup>, Vihra Milanova<sup>16</sup>, Michael J. Owen<sup>5</sup>

**Karolinska Institutet/University of North Carolina at Chapel Hill** Christina M. Hultman<sup>9,10</sup>, Paul Lichtenstein<sup>9</sup>, Emma F. Thelander<sup>9</sup>, Patrick Sullivan<sup>13</sup>

**Trinity College Dublin** Derek W. Morris<sup>8</sup>, Colm T. O'Dushlaine<sup>8</sup>, Elaine Kenny<sup>8</sup>, John L. Waddington<sup>17</sup>, Michael Gill<sup>8</sup>, Aiden Corvin<sup>8</sup>

**University College London** Andrew McQuillin<sup>6</sup>, Khalid Choudhury<sup>6</sup>, Susmita Datta<sup>6</sup>, Jonathan Pimm<sup>6</sup>, Srinivasa Thirumalai<sup>18</sup>, Vinay Puri<sup>6</sup>, Robert Krasucki<sup>6</sup>, Jacob Lawrence<sup>6</sup>, Digby Quested<sup>19</sup>, Nicholas Bass<sup>6</sup>, David Curtis<sup>20</sup>, Hugh Gurling<sup>6</sup>

**University of Aberdeen** Caroline Crombie<sup>21</sup>, Gillian Fraser<sup>21</sup>, Noelle Kwan<sup>12</sup>, Nicholas Walker<sup>22</sup>, David St Clair<sup>12</sup>

**University of Edinburgh** Douglas H. R. Blackwood<sup>7</sup>, Walter J. Muir<sup>7</sup>, Kevin McGhee<sup>7</sup>, Ben Pickard<sup>7</sup>, Pat Malloy<sup>7</sup>, Alan W. Maclean<sup>7</sup>, Margaret Van Beck<sup>7</sup>

**Queensland Institute of Medical Research** Peter M. Visscher<sup>14</sup>, Stuart Macgregor<sup>14</sup>, Naomi Wray<sup>14</sup>,

**University of Southern California** Michele T. Pato<sup>11</sup>, Helena Medeiros<sup>11</sup>, Frank Middleton<sup>23</sup>, Celia Carvalho<sup>11</sup>, Christopher Morley<sup>23</sup>, Ayman Fanous<sup>11,24-26</sup>, David Conti<sup>11</sup>, James Knowles<sup>11</sup>, Carlos Paz Ferreira<sup>27</sup>, Antonio Macedo<sup>28</sup>, M. Helena Azevedo<sup>28</sup>, Carlos N. Pato<sup>11</sup>

**Massachusetts General Hospital** Jennifer L. Stone<sup>1-4</sup>, Douglas M. Ruderfer<sup>1-4</sup>, Joshua Korn<sup>3,4</sup>, Steve A. McCarroll<sup>3,4</sup>, Mark Daly<sup>2-4</sup>, Shaun M. Purcell<sup>1-4</sup>, Pamela Sklar<sup>1-4</sup>

**Stanley Center for Psychiatric Research and Broad Institute of MIT and Harvard** Shaun M. Purcell<sup>1-4</sup>, Jennifer L. Stone<sup>1-4</sup>, Kimberly Chambert<sup>2,3</sup>, Douglas M. Ruderfer<sup>1-4</sup>, Joshua Korn<sup>3,4</sup>, Steve A. McCarroll<sup>3,4</sup>, Casey Gates<sup>3</sup>, Stacey B. Gabriel<sup>3</sup>, Scott Mahon<sup>3</sup>, Kristen Ardlie<sup>3</sup>, Mark J. Daly<sup>2-4</sup>, Edward M. Scolnick<sup>2,3</sup>, Pamela Sklar<sup>1-4</sup>

<sup>1</sup>Department of Psychiatry, Massachusetts General Hospital and Harvard Medical School, 185 Cambridge Street, Boston, Massachusetts 02114, USA.

<sup>2</sup>Stanley Center for Psychiatric Research, Broad Institute of MIT and Harvard, Cambridge, Massachusetts 02142, USA.

<sup>3</sup>Broad Institute of Harvard and Massachusetts Institute of Technology, Cambridge, Massachusetts 02142, USA.

<sup>4</sup>Center for Human Genetic Research, Massachusetts General Hospital, 185 Cambridge Street, Boston, Massachusetts 02114, USA.

<sup>5</sup>School of Medicine, Department of Psychological Medicine, Cardiff University, Cardiff C14 4XN, UK.

<sup>6</sup>Molecular Psychiatry Laboratory, Department of Mental Health Sciences, University College London Medical School, Windeyer Institute of Medical Sciences, 46 Cleveland Street, London W1T 4JF, UK.

<sup>7</sup>Division of Psychiatry, School of Molecular and Clinical Medicine, University of Edinburgh, Edinburgh EH10 5HF, UK.

<sup>8</sup>Neuropsychiatric Genetics Research Group, Department of Psychiatry and Institute of Molecular Medicine, Trinity College Dublin, Dublin 2, Ireland.

<sup>9</sup>Department of Medical Epidemiology and Biostatistics, Karolinska Institutet, SE-171 77 Stockholm, Sweden.

<sup>10</sup>Department of Neuroscience, Psychiatry, Ullera<sup>o</sup>ker, Uppsala University, SE-750 17 Uppsala, Sweden.

<sup>11</sup>Center for Genomic Psychiatry, University of Southern California, Los Angeles, California 90033, USA.

<sup>12</sup>Institute of Medical Sciences, University of Aberdeen, Foresterhill, Aberdeen AB25 2ZD, UK.

<sup>13</sup>Departments of Genetics, Psychiatry, and Epidemiology, University of North Carolina at Chapel Hill, Chapel Hill, North Carolina 27599, USA.

<sup>14</sup>Queensland Institute of Medical Research, 300 Herston Road, Brisbane, Queensland 4006, Australia.

<sup>15</sup>Department of Medical Genetics, University Hospital Maichin Dom, Sofia 1431, Bulgaria.

<sup>16</sup>Department of Psychiatry, First Psychiatric Clinic, Alexander University Hospital, Sofia 1431, Bulgaria.

<sup>17</sup>Molecular and Cellular Therapeutics and RCSI Research Institute, Royal College of Surgeons in Ireland, Dublin 2, Ireland.

<sup>18</sup>West Berkshire NHS Trust, 25 Erleigh Road, Reading RG3 5LR, UK.

<sup>19</sup>West London Mental Health Trust, Hammersmith and Fulham Mental Health Unit and St Bernard's Hospital, London W6 8RF, UK.

<sup>20</sup>Queen Mary College, University of London and East London and City Mental Health Trust, Royal London Hospital, Whitechapel, London E1 1BB, UK.

<sup>21</sup>Department of Mental Health, University of Aberdeen, Aberdeen AB25 2ZD, UK.

<sup>22</sup>Ravenscraig Hospital, Inverkip Road, Greenock PA16 9HA, UK.

<sup>23</sup>State University of New York – Upstate Medical University, Syracuse, New York 13210, USA.

<sup>24</sup>Washington VA Medical Center, Washington, DC 20422, USA.

<sup>25</sup>Department of Psychiatry, Georgetown University School of Medicine, Washington, DC 20057, USA.

<sup>26</sup>Department of Psychiatry, Virginia Commonwealth University, Richmond, VA 23298, USA.

<sup>27</sup>Department of Psychiatry, Sao Miguel, 9500-310 Azores, Portugal.

<sup>28</sup>Department of Psychiatry University of Coimbra, 3004-504 Coimbra, Portugal. {Present address: Department of Psychiatry, University of Oxford, Warneford Hospital, Headington, Oxford OX3 7JX, UK.

**Supplementary Table.**

List of genes intersected by the deletions in duplications &gt;1000kb in cases, as presented in Table 2 of the main text.

| SampleID          | Chr | Start (bp) | End (bp)  | Size (kb) | Genes in the region                                                                                                                                                                                                                                                                                                               |
|-------------------|-----|------------|-----------|-----------|-----------------------------------------------------------------------------------------------------------------------------------------------------------------------------------------------------------------------------------------------------------------------------------------------------------------------------------|
| <b>Deletions:</b> |     |            |           |           |                                                                                                                                                                                                                                                                                                                                   |
| 19336A5           | 2   | 139150475  | 140198728 | 1048      | SPOPL, NXPH2                                                                                                                                                                                                                                                                                                                      |
| 20577A5           | 3   | 17179123   | 20586352  | 3407      | TBC1D5, SATB1, KCNH8, EFHB, RAB5A, KAT2B, SGOL1                                                                                                                                                                                                                                                                                   |
| 19326C3           | 5   | 165712     | 1196298   | 1031      | PLEKHG4B, LOC389257, CCDC127, SDHA, PDCD6, AHRR, LOC116349, EXOC3, SLC9A3, CEP72, TPPP, ZDHHC11, BRD9, TRIP13, NKD2, SLC12A7                                                                                                                                                                                                      |
| 19338E3           | 6   | 48110720   | 49298238  | 1188      | C6orf138                                                                                                                                                                                                                                                                                                                          |
| 19339E4           | 7   | 137845291  | 139317586 | 1472      | TRIM24, SVOPL, ATP6V0A4, TMEM213, KIAA1549, ZC3HAV1L, ZC3HAV1, TTC26, FLJ25778, C7orf55, LUC7L2, KLRG2, CLEC2L, HIPK2, TBXAS1                                                                                                                                                                                                     |
| 19328D4           | 7   | 157744094  | 158798338 | 1054      | PTPRN2, NCAPG2, FAM62B, WDR60, VIPR2                                                                                                                                                                                                                                                                                              |
| 19338A2           | 10  | 12673372   | 14643305  | 1970      | CAMK1D, CCDC3, OPTN, MCM10, C10orf49, PHYH, SEPHS1, C10orf30, PRPF18, FRMD4A, FAM107B                                                                                                                                                                                                                                             |
| 19325A4           | 17  | 14048304   | 15357533  | 1309      | COX10, CDRT15, HS3ST3B1, FLJ45831, PMP22, TEKT3, CDRT4, FAM18B2                                                                                                                                                                                                                                                                   |
| 19338F6           | 17  | 14048304   | 15357533  | 1309      | COX10, CDRT15, HS3ST3B1, FLJ45831, PMP22, TEKT3, CDRT4, FAM18B2                                                                                                                                                                                                                                                                   |
| 19338B6           | 22  | 17275227   | 19791017  | 2516      | DGCR6, PRODH, DGCR2, DGCR14, TSSK2, GSC2, SLC25A1, CLTCL1, HIRA, MRPL40, C22orf39, UFD1L, CDC45L, CLDN5, SEPT5, GP1BB, TBX1, GNB1L, C22orf29, TXNRD2, COMT, ARVCF, C22orf25, DGCR8, HTF9C, RANBP1, ZDHHC8, RTN4R, DGCR6L, RIMBP3, ZNF74, SCARF2, KLHL22, MED15, PI4KA, SERPIND1, SNAP29, CRKL, AIFM3, LZTR1, THAP7, P2RX6, SLC7A4 |
| 19326F4           | 22  | 17275227   | 19791017  | 2516      | DGCR6, PRODH, DGCR2, DGCR14, TSSK2, GSC2, SLC25A1, CLTCL1, HIRA, MRPL40, C22orf39, UFD1L, CDC45L, CLDN5, SEPT5, GP1BB, TBX1, GNB1L, C22orf29, TXNRD2, COMT, ARVCF, C22orf25, DGCR8, HTF9C, RANBP1, ZDHHC8, RTN4R, DGCR6L, RIMBP3, ZNF74, SCARF2, KLHL22, MED15, PI4KA, SERPIND1, SNAP29, CRKL, AIFM3, LZTR1, THAP7, P2RX6, SLC7A4 |
| 20579B3           | X   | 323881     | 2726346   | 2402      | SHOX, CRLF2, CSF2RA, IL3RA, SLC25A6, ASMTL, P2RY8, SFRS17A, ASMT, DHRSX, ZBED1, CD99, XG                                                                                                                                                                                                                                          |
| 19339D3           | X   | 6505282    | 8051350   | 1546      | HDHD1A, STS, VCX, PNPLA4                                                                                                                                                                                                                                                                                                          |



| <b>Duplications:</b> |    |           |           |      |                                                                                               |
|----------------------|----|-----------|-----------|------|-----------------------------------------------------------------------------------------------|
| 19338A5              | 1  | 17118758  | 18187208  | 1068 | CROCC, MFAP2, ATP13A2, SDHB, PADI2, PADI1, PADI3, PADI4, PADI6, RCC2, ARHGEF10L, ACTL8        |
| 19326C3*             | 1  | 144964403 | 146281318 | 1317 | PRKAB2, FMO5, CHD1L, BCL9, ACP6, GJA5, GJA8, GPR89B, GPR89C, NBPF11, LOC728912                |
| 20577F4              | 2  | 106275670 | 107792241 | 1517 | ST6GAL2                                                                                       |
| 20579B4              | 3  | 58527369  | 60146377  | 1619 | FAM107A, FAM3D, C3orf67, FHIT                                                                 |
| 19336D3              | 7  | 47255074  | 49037822  | 1783 | TNS3, LOC401335, PKD1L1, FLJ21075, HUS1, SUNC1, C7orf57, UPP1, ABCA13                         |
| 19338B1              | 7  | 157623546 | 158798338 | 1175 | PTPRN2, NCAPG2, FAM62B, WDR60, VIPR2                                                          |
| 19337A5              | 8  | 136873012 | 138138546 | 1266 | -                                                                                             |
| 19325E5              | 12 | 33576567  | 34650850  | 1074 | ALG10                                                                                         |
| 19337F4              | 13 | 22466197  | 23791694  | 1325 | SGCG, SACS, TNFRSF19, MIPEP, PCOTH, RP11-45B20.2, SPATA13, C1QTNF9                            |
| 19339B1              | 14 | 80656427  | 82414847  | 1758 | TSHR, GTF2A1, STON2, SEL1L                                                                    |
| 19326C3              | 14 | 104812400 | 106318151 | 1506 | BRF1, BTBD6, PACS2, MTA1, CRIP2, CRIP1, C14orf80, TMEM121                                     |
| 19339G4              | 15 | 21246055  | 26196279  | 4950 | MKRN3, MAGEL2, NDN, C15orf2, SNRPN, SNURF, UBE3A, ATP10A, GABRB3, GABRA5, GABRG3, OCA2, HERC2 |
| 19335E2              | 15 | 28748073  | 30231488  | 1483 | MTMR15, MTMR10, TRPM1, KLF13, OTUD7A, CHRNA7                                                  |
| 19327C3              | 16 | 15032942  | 16189808  | 1157 | PDXDC1, NTAN1, RRN3, MPV17L, C16orf45, KIAA0430, NDE1, MYH11, C16orf63, ABCC1, ABCC6          |
| 19327F2              | 16 | 15032942  | 16189808  | 1157 | PDXDC1, NTAN1, RRN3, MPV17L, C16orf45, KIAA0430, NDE1, MYH11, C16orf63, ABCC1, ABCC6          |
| 20577B1              | 16 | 15032942  | 16189808  | 1157 | PDXDC1, NTAN1, RRN3, MPV17L, C16orf45, KIAA0430, NDE1, MYH11, C16orf63, ABCC1, ABCC6          |
| 19338A5              | 18 | 26180575  | 27565032  | 1384 | DSC3, DSC2, DSC1, DSG1, DSG4, DSG3, DSG2, TTR, B4GALT6                                        |
| 19326C1              | X  | 281199    | 2726346   | 2445 | SHOX, CRLF2, CSF2RA, IL3RA, SLC25A6, ASMTL, P2RY8, SFRS17A, ASMT, DHRSX, ZBED1, CD99, XG      |
| 19325H5              | X  | 6505282   | 8051350   | 1546 | HDHD1A, STS, VCX, PNPLA4                                                                      |
